# Supplementary material
Source: PubMed Central journal article supplement (PMC3037744)
Supplement: blood-2010-06-290437_1.pdf [file blood-2010-06-290437_1.pdf]

**Tissue Micro Array - DLBCL**

| Case | age | sex | CD10 | BCL-6 | MUM-1 | BCL2 | Type | plkB $\alpha$ (%) | p-p65(%) | p52(%) | NIK   | BR3   |
|------|-----|-----|------|-------|-------|------|------|-------------------|----------|--------|-------|-------|
| 1    | 80  | F   | neg  | pos   | neg   | 1    | GC   | 73.1              | 86.45    | 70.72  | 97.79 | 52.97 |
| 2    | 72  | M   | pos  | pos   | neg   | 1    | GC   | 64.5              | 18.19    | 87.2   | 96.71 | 38.21 |
| 3    | 44  | M   | neg  | neg   | neg   | NA   | ABC  | 71.9              | 82.02    | 70.24  | NA    | NA    |
| 4    |     |     |      |       |       | NA   |      | 69.44             | 73.73    | 58.33  | 82.32 | 67.81 |
| 5    |     |     |      |       |       | NA   |      | NA                | 49.05    | 43.04  | 93.78 | 67.03 |
| 6    | 59  | M   | pos  | pos   | neg   | 2    | GC   | 56.4              | 86.42    | 91.4   | 97.15 | 57.74 |
| 7    | 52  | M   | neg  | neg   | pos   | 2    | ABC  | 43.9              | 82.39    | 83.61  | 98.26 | 86.15 |
| 8    | 40  | F   | neg  | neg   | pos   | 1    | ABC  | 43.4              | 86.79    | 82.79  | 98.58 | 46.65 |
| 9    | 53  | M   | neg  | neg   | neg   | 2    | ABC  | 87.9              | 76.67    | 75     | 99.02 | 41.87 |
| 10   | 23  | M   |      |       |       | 1    |      | 61.2              | 77.93    | 73.69  | NA    | NA    |
| 11   | 73  | F   | neg  | neg   | pos   | 2    | ABC  | 54.6              | 87.5     | 93.71  | 97.49 | 38.36 |
| 12   | 68  | M   | neg  | pos   | pos   | 2    | ABC  | 40.5              | 62.61    | 90.39  | 95.85 | 99.13 |
| 13   | 63  | M   |      |       |       | NA   |      | 71.6              | 64.24    | 61.15  | NA    | NA    |
| 14   | 53  | F   | neg  | neg   | neg   | 2    | ABC  | 70.9              | 85.94    | 86.3   | 99.47 | 18.39 |
| 15   | 77  | F   | pos  | pos   | neg   | 0    | GC   | 74                | 86.45    | 70.72  | NA    | NA    |
| 16   | 68  | F   | neg  | neg   | neg   | 0    | ABC  | 57.7              | 72.97    | 79.72  | 99.62 | 40.7  |
| 17   | 75  | M   | pos  | pos   | neg   | 0    | GC   | 69.3              | 82.15    | 95.53  | 93.52 | 99.09 |
| 18   | 26  | M   | neg  | neg   | neg   | 2    | ABC  | 9.8               | 19.93    | 78.96  | 97.19 | 28.65 |
| 19   | 78  | M   | neg  | neg   | neg   | 0    | ABC  | 52.9              | 67.55    | 88.19  | 94.31 | 56.52 |
| 20   | 59  | F   | neg  | neg   | neg   | 0    | ABC  | 41.9              | 67.52    | 85.24  | 95.94 | 66.39 |
| 21   | 55  | F   | neg  | pos   | neg   | NA   | GC   | 19                | 46.04    | 80.52  | 25    | 15    |
| 22   | 65  | M   | pos  | pos   | neg   | 0    | GC   | 70.3              | 53.75    | 60.29  | 97.96 | 65.41 |
| 23   | 52  | M   |      |       |       | 2    |      | 0.25              | 0.85     | 54.23  | 99.34 | 35.74 |
| 24   | 40  | M   | pos  | pos   | neg   | NA   | GC   | 89.8              | 70.36    | 86     | NA    | NA    |
| 25   | 64  | F   | pos  | neg   | neg   | 2    | GC   | 10.4              | 31.44    | 68.55  | 93.61 | 84.97 |
| 26   | 62  | F   | neg  | neg   | neg   | 2    | ABC  | 87                | 75.91    | 79.97  | 99.15 | 57.26 |
| 27   | 45  | F   |      |       |       | 1    |      | 87.1              | 78.02    | 65.17  | NA    | NA    |
| 28   | 72  | F   | neg  | neg   | pos   | 1    | ABC  | 52.3              | 73.51    | 93.06  | 95.88 | 54.79 |
| 29   | 51  | M   | neg  | neg   | pos   | 1    | ABC  | 53.6              | 87.5     | 93.71  | 95.25 | 49.81 |
| 30   | 69  | M   | neg  | neg   | neg   | 2    | ABC  | 46.2              | 86.97    | 88.68  | 91.88 | 45.33 |
| 31   | 67  | F   | neg  | pos   | neg   | 0    | GC   | 66.5              | 79.65    | 80.84  | 94.89 | 85.95 |
| 32   | 62  | M   | neg  | pos   | neg   | 0    | GC   | 63.7              | 65.76    | 79.85  | 93.14 | 73.63 |
| 33   | 34  | M   |      |       |       | 0    |      | 76.2              | 73.36    | 87.61  | 99.33 | 51.48 |
| 34   | 72  | F   | neg  | pos   | neg   | 1    | GC   | 78.9              | 58.55    | 100    | NA    | NA    |
| 35   | 33  | M   | neg  | neg   | neg   | 0    | ABC  | 18.8              | 59.96    | 73.19  | 97.87 | 58.97 |
| 36   | 53  | M   | neg  | neg   | neg   | 0    | ABC  | 32.3              | 34.33    | 50.32  | 60.96 | 26.87 |
| 37   | 53  | M   | neg  | pos   | neg   | 2    | GC   | 67.5              | 89.07    | 71.82  | NA    | NA    |
| 38   | 53  | M   | pos  | pos   | neg   | 2    | GC   | 63.7              | 85.67    | 78.34  | NA    | 70.66 |
| 39   | 64  | F   | pos  | pos   | neg   | 0    | GC   | 70.2              | 80.44    | 90.95  | 99.51 | 83.34 |
| 40   | 62  | F   | neg  | neg   | neg   | 0    | ABC  | 44.8              | 65.8     | 62.26  | 99.56 | 47.4  |
| 41   | 42  | M   | neg  | pos   | pos   | 0    | ABC  | 61.1              | 40.93    | 65.93  | NA    | 57.86 |
| 42   | 50  | F   | neg  | neg   | neg   | 0    | ABC  | 95.8              | 97.85    | 88.28  | 99.76 | 20.42 |
| 43   | 63  | M   | neg  | neg   | neg   | 2    | ABC  | 54.61             | NA       | 84.22  | 99.36 | 66.77 |

**Figure S1. Tissue Microarray (TMA) and immunohistochemical analysis of DLBCL biopsies.**

This table shows the data that characterize the 43 cases of DLBCL on the TMA slide by immunohistochemistry staining. The Applied Imaging Ariol automated analysis system (Genetix, New Milton, Hampshire, UK) was used for the quantification of plkB $\alpha$ , pp65, p52, NIK, and BR3 TMA slides. Numbers represent the percentage of positive cells in each biopsy-core. NA, not applicable. Pos, positive; Neg, negative. For bcl-2, numbers 0-2 represents immunostaining intensity. 0, negative; 1, low; 2, high.

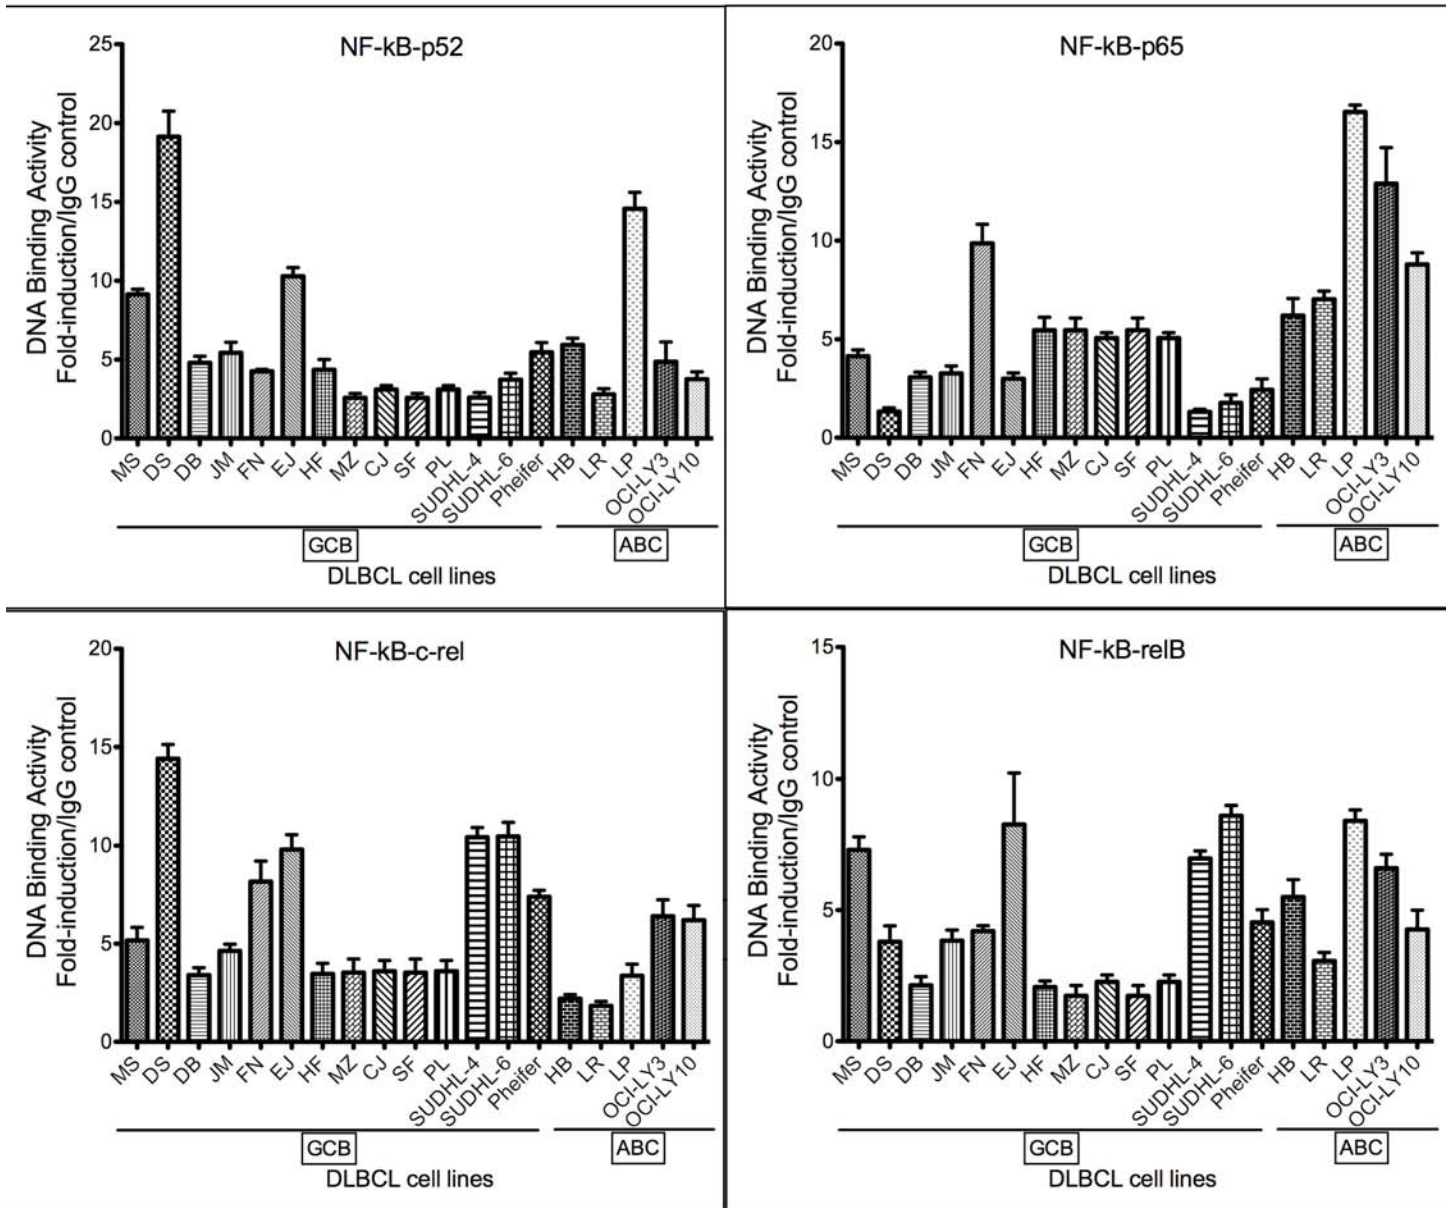

**Figure S2A. NF-κB DNA-Binding Analysis in DLBCL Cell Lines.** NF-κB DNA binding activity for each NF-κB member (as indicated) was measured using the TransAM–NF-κB family ELISA from Active Motif with nuclear extracts (5 ug) purified from 17 GCB- and ABC-derived DLBCL cell lines. DNA binding activity was quantified by colorimetry (mean ± SD). Each NF-κB component antibody was validated by incubating sample that includes a wild-type or a mutant cold probe or a nonspecific IgG control (data not shown). Data for the NF-κB component represent fold-induction over IgG control.

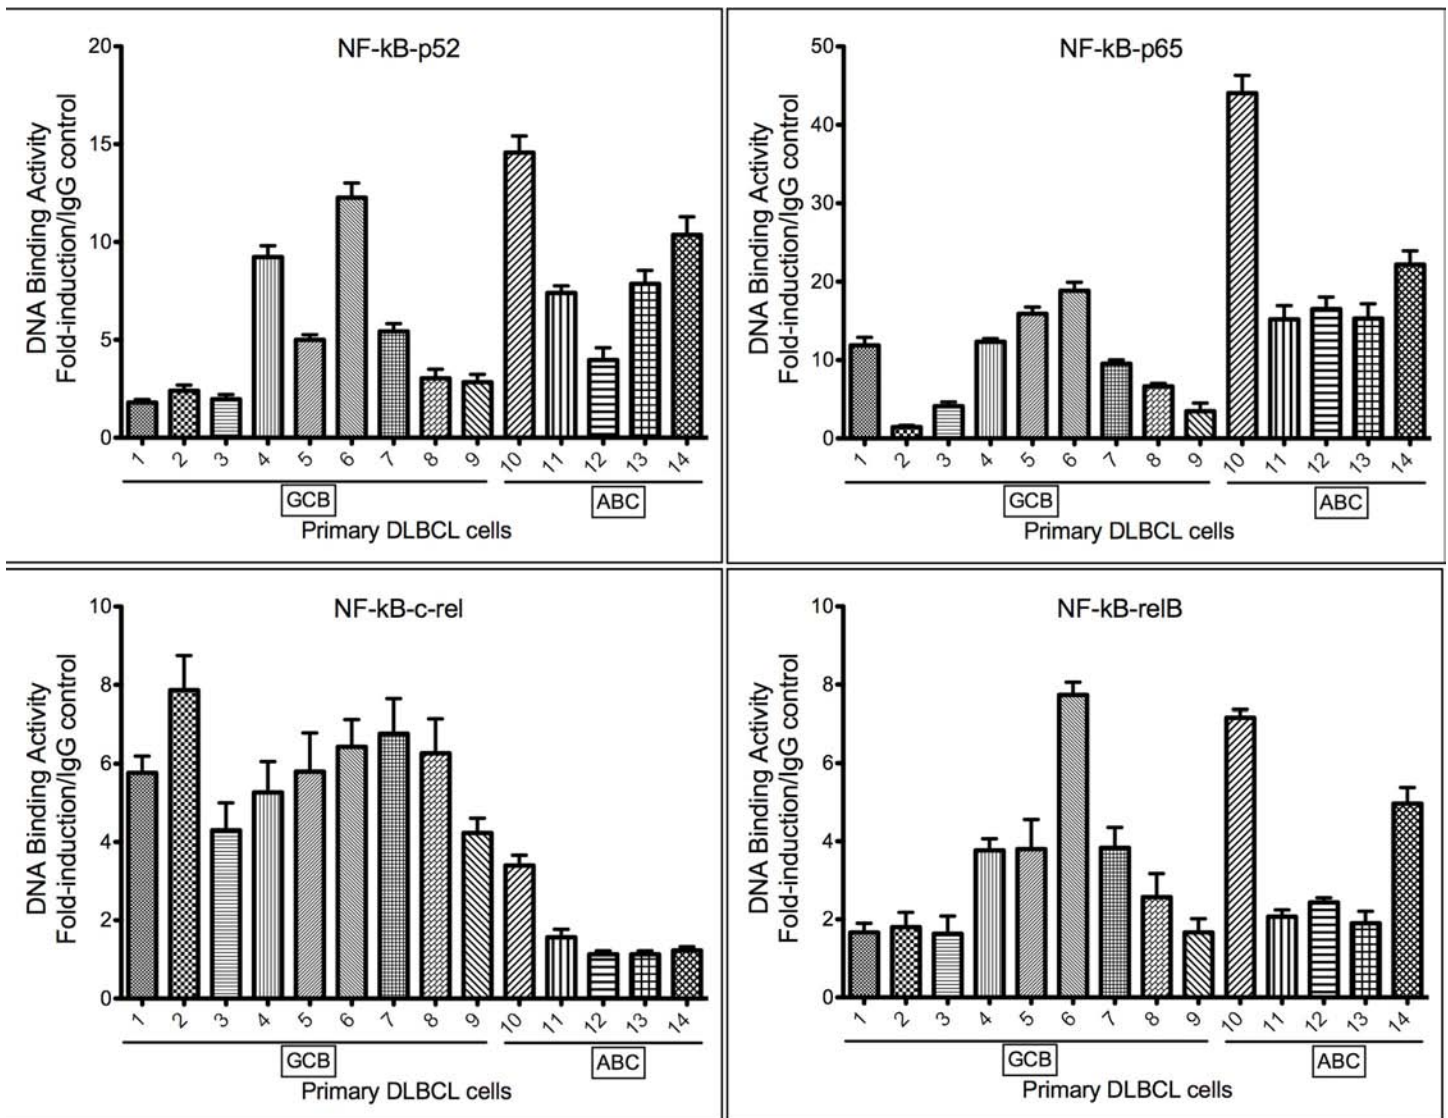

**Figure S2B. NF-κB DNA-Binding Analysis in Primary DLBCL Samples.** NF-κB DNA binding activity for each NF-κB member (as indicated) was measured using the TransAM–NF-κB family ELISA from Active Motif with nuclear extracts (5 ug) purified from 14 primary GCB-and ABC DLBCL cells. DNA binding activity was quantified by colorimetry (mean ± SD). Each NF-κB component antibody was validated by incubating sample that includes a wild-type or a mutant cold probe or a nonspecific IgG control (data not shown). Data for the NF-κB component represent fold-induction over IgG control.
